# Supplementary material for: A DNA assembly toolkit to unlock the CRISPR/Cas9 potential for metabolic engineering
Source: Research Square preprint supplement (doi:10.21203/rs.3.rs-1570357/v1), 2022-04-22
Supplement: Supplementary file 1 [file 668f4181940bb491cecb3bd4.pdf]

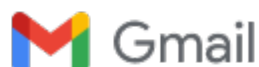

Tigran Yuzbashev &lt;t.yuzbashev@gmail.com&gt;

---

**Re: about the personal communication reference**

---

**Blenner, Mark** <blenner@udel.edu>

6 января 2022 г., 05:41

Кому: "t.yuzbashev@gmail.com" &lt;t.yuzbashev@gmail.com&gt;

I would not necessarily agree with the statement. This would be more accurate to me:

For example, it was observed that some sites of *Yarrowia lipolytica* genome are just not amenable to CRISPR/Cas9 modification, ~~while marker-based integration still works for them~~ (personal communication with Prof. Mark Blenner).

**Mark Blenner** | (he/him/his)

Associate Professor

Director, GAANN: Inclusive Teaching in Chemical Eng.

Chemical &amp; Biomolecular Engineering

[590 Avenue 1743, Rm. 507](#)

Ammon Pinizzotto Biopharmaceutical Innovation Center

Newark, DE 19713

(302)-831-7348

[blenner@udel.edu](mailto:blenner@udel.edu)[Follow on Twitter](#) | [Visit the Website](#)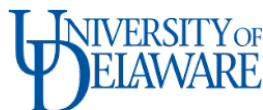

CONFIDENTIALITY NOTICE: The information contained in this transmission may contain privileged and confidential information protected by federal and state privacy laws. It is intended only for the use of the person(s) named above. If you are not the intended recipient, you are hereby notified that any review, dissemination, distribution, or duplication of this communication is strictly prohibited. If you are not the intended recipient, please contact the sender by reply email and destroy all copies of the original message.

---

**From:** Tigran Yuzbashev <t.yuzbashev@gmail.com>**Date:** Wednesday, January 5, 2022 at 9:30 PM**To:** Blenner, Mark <blenner@udel.edu>
